# Supplementary material for: First Integrative Taxonomic Insights into the Genus Hemiramphus (Family: Hemiramphidae) from the Indian Coast
Source: Research Square preprint supplement (doi:10.21203/rs.3.rs-7178444/v1), 2025-07-24
Supplement: Supplementary file 1 [file 1564e042863837cce18382c9.docx]

| **Sl.no** | **Species** | **NCBI Accession no** | **Reported as** | **Location** |
| --- | --- | --- | --- | --- |
|  | **Cytochrome oxidase 1 (CO I)** |  |  |  |
| 1 | *Hemiramphus archipelagicus* | MK995078 | *H. far* | Bangladesh |
| 2 | *Hemiramphus archipelagicus* | KY315367 | *H. far* | Fuji |
| 3 | *Hemiramphus archipelagicus* | KY315372 | *H. far* | Fuji |
| 4 | *Hemiramphus far* | OQ386302 | *H. far* | Philippines |
| 5 | *Hemiramphus far* | HQ564418 | *H. far* | Indonesia |
| 6 | *Hemiramphus far* | EU148547 | *H. far* | India |
| 7 | *Hemiramphus far* | MT888964 | *H. far* | Mauritius |
| 8 | *Hemiramphus far* | KU943244 | *H. far* | Taiwan |
| 9 | *Hemiramphus lutkei* | OR113914 | *H. lutkei* | Philippines |
| 10 | *Hemiramphus lutkei* | MN855097 | *H. lutkei* | India |
| 11 | *Hemiramphus lutkei* | OM927975 | *H. lutkei* | Indonesia |
| 12 | *Hemiramphus lutkei* | OR113909 | *H. lutkei* | Indonesia |
| 13  14 | *Hemiramphus lutkei*  *Ablennes hians* (outgroup) | MN855098  OP247590 | *H. lutkei*  *A. hians* | India  Beibu gulf |
|  | **16SrRNA** |  |  |  |
| 1 | *Hemiramphus far* | AY693486 | *H. far* |  |
| 2 | *Hemiramphus far* | MK561619 | *H. far* | Bangladesh |
| 3 | *Hemiramphus lutkei* | OP056959 | *H. balao* |  |
| 4 | *Hemiramphus lutkei* | AF243948 | *H. balao* |  |
| 5  6 | *Hemiramphus lutkei*  *Ablennes hians (outgroup)* | NC088002  AF243935 | *H. brasiliensis*  *A. hians* | Philippines |
