# Supplementary material for: First Integrative Taxonomic Insights into the Genus Hemiramphus (Family: Hemiramphidae) from the Indian Coast
Source: Research Square preprint supplement (doi:10.21203/rs.3.rs-7178444/v1), 2025-07-24
Supplement: Supplementary file 2 [file 29ef88a46ac15d0a23ed2b85.docx]

| **Sl.**  **no** | **Species** | **Museum Accession number** | **NCBI Accession number** | | **Co-ordinates** | **Collection location** |
| --- | --- | --- | --- | --- | --- | --- |
| **COI** | **16SrRNA** |
| 1 | *Hemiramphus archipelagicus* | DNR. No.GB.10.4.6.1.1 | PV335940 | PV335971 | 8°53'19.5"N 78°10'23.1"E | Tharuvaikulam, Tuticorin, Tamil Nadu |
| 2 | *Hemiramphus archipelagicus* | DNR. No.GB.10.4.6.1.2 | PV335942 | PV347103 | 9°58'57.3"N 76°14'33.9"E | Kalamukk, Kochi, Kerala |
| 3 | *Hemiramphus archipelagicus* | DNR. No.GB.10.4.6.1.3 | PV335941 |  | 19°58'48.0"N 86°19'12.0"E | Nuagarh, Astaranga, Odisha |
| 4 | *Hemiramphus archipelagicus* | DNR. No.GB.10.4.6.1.4 | PV335944 |  | 18°54'34.3"N 72°49'13.4"E | Sasson Dock, Bombay, Maharashtra |
| 5 | *Hemiramphus far* | DNR. No. GB.10.4.6.6.1, | PV342424 | PV335973 | 9°16'50.6"N 79°12'27.3"E | Pamban, Mandapam, Tamil Nadu |
| 6 | *Hemiramphus far* | DNR. No. GB.10.4.6.6.2, | PV335950 | PV347104 | 8°56'15.3"N 76°32'19.4"E | Neendakara, Kollam, Kerala |
| 7 | *Hemiramphus far* | DNR. No. GB.10.4.6.6.3, | PV335951 |  | 19°58'48.0"N 86°19'12.0"E | Nuagarh, Astaranga, Odisha |
| 8 | *Hemiramphus far* | Not submitted in museum | PV339642 |  | 10°33'59.1"N 72°38'13.6"E | Kavaratti, Lakshadweep |
| 9 | *Hemiramphus lutkei* | DNR. No. GB.10.4.6.7.1 | PV335955 | PV335974 | 8°53'19.5"N 78°10'23.1"E | Tharuvaikulam, Tuticorin, Tamil Nadu |
| 10 | *Hemiramphus lutkei* | DNR. No. GB.10.4.6.7.2 | PV335957 | PV347105 | 9°58'57.3"N 76°14'33.9"E | Kalamukk, Kochi, Kerala |
| 11 | *Hemiramphus lutkei* | DNR. No. GB.10.4.6.7.3 | PV335966 |  | 19°58'48.0"N 86°19'12.0"E | Nuagarh, Astaranga, Odisha |
| 12 | *Hemiramphus lutkei* | DNR. No. GB.10.4.6.7.4 | PV339713 |  | 11°39'33.2"N 92°43'33.6"E | Junghalighat, Port Blair, A& N Islands |
