# Supplementary material for: First Integrative Taxonomic Insights into the Genus Hemiramphus (Family: Hemiramphidae) from the Indian Coast
Source: Research Square preprint supplement (doi:10.21203/rs.3.rs-7178444/v1), 2025-07-24
Supplement: Supplementary file 3 [file 6a4e49f75cb16241be3b97fb.docx]

| **Sl no** | **Characters** | ***Hemiramphus archipelagicus*** (N=15) | ***Hemiramphus far*** (N=15) | ***Hemiramphus lutkei*** (N=15) |
| --- | --- | --- | --- | --- |
| **A** | **Morphometry** |  |  |  |
| 1 | Standard length | 12.5-22.45 | 19.1-25.6 | 18.9-22.8 |
| 2 | Head length | 2.93-5.14 | 4.2-5.81 | 4.4-5.4 |
|  | **In% of SL** |  |  |  |
| 1 | Head length | 22.0-24.3 | 21.5-24.3 | 22.4-24.0 |
| 2 | Eye diameter | 5.2-6.3 | 5.4-6.3 | 5.1-6.2 |
| 3 | Prepectoral length | 25.0-27.4 | 23.3-26.3 | 24.5-26.2 |
| 4 | Prepelvic length | 65.4-67.4 | 66.0-68.6 | 64.7-67.5 |
| 5 | Predorsal length | 74.4-78.3 | 76.3-79.0 | 75.5-79.2 |
| 6 | Preanal length | 78.6-83.7 | 82.4-86.0 | 80.4-84.7 |
| 7 | Dorsal baselength | 13.9-17.7 | 11.9-15.0 | 13.6-15.7 |
| 8 | Anal baselength | 8.5-11.8 | 6.3-8.2 | 7.0-9.6 |
| 9 | Pectoral length | 16.2-19.2 | 14.4-17.0 | 15.3-20.0 |
| 10 | Pelvic length | 7.5-10.3 | 8.3-10.4 | 7.0-9.6 |
| 11 | Dorsal height | 8.7-12.4 | 11.8-15.3 | 9.0-10.4 |
| 12 | Anal height | 5.3-9.6 | 6.6-8.3 | 5.0-7.4 |
| 13 | Caudal upper | 17.3-28.8 | 18.7-21.4 | 16.9-19.2 |
| 14 | Caudal lower | 18.3-25.4 | 23.0-25.7 | 21.8-26.5 |
| 15 | Caudal peduncle depth | 5.5-6.4 | 6.8-7.7 | 5.8-6.5 |
| 16 | Depth at anal fin origin | 12.5-15.0 | 13.5-16.5 | 12.0-16.1 |
|  | **In % of HL** |  |  |  |
| 1 | Eye diameter | 22.0-26.0 | 24.0-27.5 | 22.0-26.0 |
| 2 | Interorbital width | 5.0-5.6 | 23.4-29.5 | 21.5-24.7 |
| 3 | Preorbital length | 32.4-36.7 | 33.3-35.0 | 31.0-35.0 |
| 4 | Post orbital length | 39.2-43.4 | 38.5-42 | 40.0-46.0 |
| 5 | Upper jaw length | 15.4-19.7 | 19.3-23.2 | 15.0-21.0 |
| 6 | Lower jaw length | 135.0-155.0 | 131.0-151.0 | 132.0-154.0 |
| 7 | Upper jaw width | 15.4-17.3 | 18.0-21.0 | 13.3-17.8 |
| 8 | Lower jaw width | 13.6-15.4 | 19.6-24 | 13.4-18.4 |
|  | **In % of ED** |  |  |  |
| 1 | Interorbital width | 87.5-104.0 | 95.0-111.0 | 86.0-102.0 |
| 2 | Upper jaw length | 62.5-82.0 | 72.0-90.0 | 54.7-94.0 |
| 3 | Upper jaw width | 61.0-71.0 | 71.0-81.0 | 56.0-72.0 |
| **B** | **Meristic** |  |  |  |
| 1 | Dorsal fin rays | 13-14 | 12-13 | 12-14 |
| 2 | Anal fin rays | 11-13 | 10-12 | 11-13 |
| 3 | Pelvic fin rays | 6 | 6 | 6 |
| 4 | Pectoral fin rays | 11-12 | 11-13 | 10-11 |
| 5 | Gill rakers- 1st gill arch | 35-38 | 28-31 | 38-40 |
| 6 | Gill rakers- 2nd gill arch | 21-26 | 20-25 | 28-33 |
| 7 | Lat Line Scales | 54-56 | 53-54 | 55-58 |
| 8 | Predorsal scales | 32-34 | 35-38 | 38-42 |
| 9 | Vertebrae | 53-54 | 50-53 | 53-56 |
