# Supplementary material for: First Integrative Taxonomic Insights into the Genus Hemiramphus (Family: Hemiramphidae) from the Indian Coast
Source: Research Square preprint supplement (doi:10.21203/rs.3.rs-7178444/v1), 2025-07-24
Supplement: Supplementary file 4 [file b1b327eb8b74eb3b0bfde338.docx]

| OR113914.1_Hemiramphus_lutkei |  |  |  |  |  |  |  |  |  |  |  |  |  |  |  |  |  |  |  |  |  |  |  |  |  |
| --- | --- | --- | --- | --- | --- | --- | --- | --- | --- | --- | --- | --- | --- | --- | --- | --- | --- | --- | --- | --- | --- | --- | --- | --- | --- |
| MN855097.1_Hemiramphus_lutkei | 0.000 |  |  |  |  |  |  |  |  |  |  |  |  |  |  |  |  |  |  |  |  |  |  |  |  |
| OM927975.1_Hemiramphus_lutkei | 0.005 | 0.005 |  |  |  |  |  |  |  |  |  |  |  |  |  |  |  |  |  |  |  |  |  |  |  |
| OR113909.1_Hemiramphus_lutkei | 0.007 | 0.007 | 0.007 |  |  |  |  |  |  |  |  |  |  |  |  |  |  |  |  |  |  |  |  |  |  |
| MN855098.1_Hemiramphus_lutkei | 0.007 | 0.007 | 0.007 | 0.005 |  |  |  |  |  |  |  |  |  |  |  |  |  |  |  |  |  |  |  |  |  |
| PV335955_Hemiramphus_lutkei | 0.000 | 0.000 | 0.005 | 0.007 | 0.007 |  |  |  |  |  |  |  |  |  |  |  |  |  |  |  |  |  |  |  |  |
| PV335966_Hemiramphus_lutkei | 0.000 | 0.000 | 0.005 | 0.007 | 0.007 | 0.000 |  |  |  |  |  |  |  |  |  |  |  |  |  |  |  |  |  |  |  |
| PV339713_Hemiramphus_lutkei | 0.000 | 0.000 | 0.005 | 0.007 | 0.007 | 0.000 | 0.000 |  |  |  |  |  |  |  |  |  |  |  |  |  |  |  |  |  |  |
| PV335957_Hemiramphus_lutkei | 0.005 | 0.005 | 0.000 | 0.007 | 0.007 | 0.005 | 0.005 | 0.005 |  |  |  |  |  |  |  |  |  |  |  |  |  |  |  |  |  |
| KY315367.1_Hemiramphus_far | 0.075 | 0.075 | 0.080 | 0.077 | 0.077 | 0.075 | 0.075 | 0.075 | 0.080 |  |  |  |  |  |  |  |  |  |  |  |  |  |  |  |  |
| MK995078.1_Hemiramphus_far | 0.075 | 0.075 | 0.080 | 0.077 | 0.077 | 0.075 | 0.075 | 0.075 | 0.080 | 0.000 |  |  |  |  |  |  |  |  |  |  |  |  |  |  |  |
| KY315372.1_Hemiramphus_far | 0.075 | 0.075 | 0.080 | 0.077 | 0.077 | 0.075 | 0.075 | 0.075 | 0.080 | 0.000 | 0.000 |  |  |  |  |  |  |  |  |  |  |  |  |  |  |
| PV335940_Hemiramphus_archipelagicus | 0.077 | 0.077 | 0.083 | 0.080 | 0.080 | 0.077 | 0.077 | 0.077 | 0.083 | 0.002 | 0.002 | 0.002 |  |  |  |  |  |  |  |  |  |  |  |  |  |
| PV335940_Hemiramphus_archipelagicus | 0.075 | 0.075 | 0.080 | 0.077 | 0.077 | 0.075 | 0.075 | 0.075 | 0.080 | 0.000 | 0.000 | 0.000 | 0.002 |  |  |  |  |  |  |  |  |  |  |  |  |
| PV335941_Hemiramphus_archipelagicus | 0.075 | 0.075 | 0.080 | 0.077 | 0.077 | 0.075 | 0.075 | 0.075 | 0.080 | 0.000 | 0.000 | 0.000 | 0.002 | 0.000 |  |  |  |  |  |  |  |  |  |  |  |
| PV335944_Hemiramphus_archipelagicus | 0.077 | 0.077 | 0.083 | 0.080 | 0.080 | 0.077 | 0.077 | 0.077 | 0.083 | 0.002 | 0.002 | 0.002 | 0.005 | 0.002 | 0.002 |  |  |  |  |  |  |  |  |  |  |
| PV342424_Hemiramphus_far | 0.061 | 0.061 | 0.067 | 0.067 | 0.067 | 0.061 | 0.061 | 0.061 | 0.067 | 0.045 | 0.045 | 0.045 | 0.048 | 0.045 | 0.045 | 0.043 |  |  |  |  |  |  |  |  |  |
| PV335950_Hemiramphus_far | 0.061 | 0.061 | 0.067 | 0.067 | 0.067 | 0.061 | 0.061 | 0.061 | 0.067 | 0.045 | 0.045 | 0.045 | 0.048 | 0.045 | 0.045 | 0.043 | 0.000 |  |  |  |  |  |  |  |  |
| PV335951_Hemiramphus_far | 0.061 | 0.061 | 0.067 | 0.067 | 0.067 | 0.061 | 0.061 | 0.061 | 0.067 | 0.045 | 0.045 | 0.045 | 0.048 | 0.045 | 0.045 | 0.043 | 0.000 | 0.000 |  |  |  |  |  |  |  |
| PV339642_Hemiramphus_far | 0.061 | 0.061 | 0.067 | 0.067 | 0.067 | 0.061 | 0.061 | 0.061 | 0.067 | 0.045 | 0.045 | 0.045 | 0.048 | 0.045 | 0.045 | 0.043 | 0.000 | 0.000 | 0.000 |  |  |  |  |  |  |
| OQ386302.1_Hemiramphus_far | 0.061 | 0.061 | 0.067 | 0.067 | 0.067 | 0.061 | 0.061 | 0.061 | 0.067 | 0.045 | 0.045 | 0.045 | 0.048 | 0.045 | 0.045 | 0.043 | 0.000 | 0.000 | 0.000 | 0.000 |  |  |  |  |  |
| HQ564418.1_Hemiramphus_far | 0.061 | 0.061 | 0.067 | 0.067 | 0.067 | 0.061 | 0.061 | 0.061 | 0.067 | 0.045 | 0.045 | 0.045 | 0.048 | 0.045 | 0.045 | 0.043 | 0.000 | 0.000 | 0.000 | 0.000 | 0.000 |  |  |  |  |
| EU148547.1_Hemiramphus_far | 0.061 | 0.061 | 0.067 | 0.067 | 0.067 | 0.061 | 0.061 | 0.061 | 0.067 | 0.045 | 0.045 | 0.045 | 0.048 | 0.045 | 0.045 | 0.043 | 0.000 | 0.000 | 0.000 | 0.000 | 0.000 | 0.000 |  |  |  |
| MT888964.1_Hemiramphus_far | 0.061 | 0.061 | 0.067 | 0.067 | 0.067 | 0.061 | 0.061 | 0.061 | 0.067 | 0.045 | 0.045 | 0.045 | 0.048 | 0.045 | 0.045 | 0.043 | 0.000 | 0.000 | 0.000 | 0.000 | 0.000 | 0.000 | 0.000 |  |  |
| KU943244.1_Hemiramphus_far | 0.061 | 0.061 | 0.067 | 0.067 | 0.067 | 0.061 | 0.061 | 0.061 | 0.067 | 0.045 | 0.045 | 0.045 | 0.048 | 0.045 | 0.045 | 0.043 | 0.000 | 0.000 | 0.000 | 0.000 | 0.000 | 0.000 | 0.000 | 0.000 |  |
| OP247590.1_Ablennes_hians | 0.209 | 0.209 | 0.212 | 0.216 | 0.216 | 0.209 | 0.209 | 0.209 | 0.212 | 0.202 | 0.202 | 0.202 | 0.198 | 0.202 | 0.202 | 0.206 | 0.202 | 0.202 | 0.202 | 0.202 | 0.202 | 0.202 | 0.202 | 0.202 | 0.202 |
