# Supplementary material for: First Integrative Taxonomic Insights into the Genus Hemiramphus (Family: Hemiramphidae) from the Indian Coast
Source: Research Square preprint supplement (doi:10.21203/rs.3.rs-7178444/v1), 2025-07-24
Supplement: Supplementary file 5 [file ca233ee3ad2434424eeab273.docx]

| OP056959.1_Hemiramphus_balao |  |  |  |  |  |  |  |  |  |  |  |
| --- | --- | --- | --- | --- | --- | --- | --- | --- | --- | --- | --- |
| NC_088002.1_Hemiramphus_brasiliensis | 0.000 |  |  |  |  |  |  |  |  |  |  |
| AF243948.1_Hemiramphus_balao | 0.000 | 0.000 |  |  |  |  |  |  |  |  |  |
| PV335974_Hemiramphus_lutkei | 0.000 | 0.000 | 0.000 |  |  |  |  |  |  |  |  |
| PV347105_Hemiramphus_lutkei | 0.000 | 0.000 | 0.000 | 0.000 |  |  |  |  |  |  |  |
| PV335971_Hemiramphus_archipelagicus | 0.025 | 0.025 | 0.025 | 0.025 | 0.025 |  |  |  |  |  |  |
| PV347103_Hemiramphus_archipelagicus | 0.025 | 0.025 | 0.025 | 0.025 | 0.025 | 0.000 |  |  |  |  |  |
| PV335973_Hemiramphus_far | 0.029 | 0.029 | 0.029 | 0.029 | 0.029 | 0.010 | 0.010 |  |  |  |  |
| PV335973_Hemiramphus_far | 0.029 | 0.029 | 0.029 | 0.029 | 0.029 | 0.010 | 0.010 | 0.000 |  |  |  |
| AY693486.1_Hemiramphus_far | 0.029 | 0.029 | 0.029 | 0.029 | 0.029 | 0.010 | 0.010 | 0.000 | 0.000 |  |  |
| MK561619.1_Hemiramphus_far | 0.029 | 0.029 | 0.029 | 0.029 | 0.029 | 0.010 | 0.010 | 0.000 | 0.000 | 0.000 |  |
| AF243935.1_Ablennes_hians | 0.153 | 0.153 | 0.153 | 0.153 | 0.153 | 0.145 | 0.145 | 0.144 | 0.144 | 0.144 | 0.144 |
