# Supplementary material for: First Integrative Taxonomic Insights into the Genus Hemiramphus (Family: Hemiramphidae) from the Indian Coast
Source: Research Square preprint supplement (doi:10.21203/rs.3.rs-7178444/v1), 2025-07-24
Supplement: Supplementary file 6 [file e5f7f9dc0cbc0d928be2f21e.docx]

| **Sl no** | **Characters** | ***Hemiramphus archipelagicus*** | | ***Hemiramphus far*** | | ***Hemiramphus lutkei*** | |
| --- | --- | --- | --- | --- | --- | --- | --- |
| **Collette (1978)** | **Present study** | **Collette and Su (1986)** | **Present study** | **Collette and Su (1986)** | **Present study** |
| 1 | Head in Standard length | 4.1-4.5 | 4.0-4.4 | 3.8-4.6 | 4.0-4.5 | 4.1-4.35 | 4.1-4.3 |
| 2 | Lower jaw in Standard length | 3.1-3.4 | 3-3.35 | 3.0-3.9 | 3.2-3.7 | 2.9-3.8 | 3.1-3.65 |
| 3 | Lower jaw in Head length | .7-.8 | .64-.75 | .7-.95 | .66-.78 | .7-.8 | .7-.75 |
| 4 | Body width in depth | 1.8-2.0 | 1.7-1.97 | 1.3-1.8 | 1.45-1.77 | 1.8-2.05 | 1.75-1.95 |
| 5 | Anal fin baselength in Dorsal fin baselength | 1.55-1.8 | 1.5-1.8 | 1.6-2.4 | 1.7-2.1 | 1.4-1.9 | 1.5-1.9 |
| 6 | Pectoral height in Standard length | 5.8-6.8 | 5.9-6.55 | 5.4-6.6 | 5.35-6.38 | 4.8-5.4 | 4.7-5.15 |
| 7 | Pelvic height in Standard length | 9.0-10.5 | 9.2-10.45 | 8.2-10.5 | 8.4-10.0 | 8.8-10.7 | 9.0-10.4 |
| 8 | Pectoral to Pelvic/Pelvic to Anal | 1.35-1.55 | 1.3-1.6 | 1.2-1.5 | 1.15-1.5 | 1.25-1.4 | 1.3-1.5 |
| 9 | Dorsal fin Rays | 11 -15 | 13-14 | 12 - 14 | 12 - 13 | 13-15 | 12 -14 |
| 10 | Anal fin rays | 10 -13 | 11 -12 | 10 -12 | 10 -11 | 11- 13 | 11 - 13 |
| 11 | Pectoral Rays | 11 -12 | 11-12 | 11 -13 | 11 -12 | 10 - 12 | 10 -11 |
| 12 | Predorsal scales | 32-36 | 32-34 | 32-39 | 35-38 | 36-41 | 38-42 |
| 13 | Vertebrae | 52-54 | 53-54 | 50-55 | 50-53 | 52-57 | 53-56 |
| 14 | Gill rakers in first gill arch | 25-32 | 35-38 | 29-33 | 28-31 | 36-41 | 38-40 |
| 15 | Gill rakers in second gill arch | 20-25 | 21-26 | 21-27 | 20-25 | 25-36 | 28-33 |
| 16 | Interorbital width | Greater than ED | Greater than ED | Greater than ED | Greater than ED | Less than ED | Less than ED |
| 17 | Bars on Body | Absent | Absent | 3 to 9 | 3 to 8 | Absent | Absent |
| 18 | Dorsal fin- Anal fin origin | 4th-5th ray | 4th-5th ray | 6th-8th ray | 6th-8th ray | 4th-5th ray | 4th-5th ray |
| 19 | Pectoral fin length | Moderate | Moderate | Moderate | Moderate | Long | Long |
| 20 | Anterior lobe of dorsal fin | Not well developed | Not well developed | Well developed | Well developed | Moderately developed | Moderately developed |
| 21 | Pigmentation in fins | Absent | Absent | Present | Present | Absent | Absent |
